# 1 **A machine learning and network framework to discover new indications for** 2 **small molecules**

3  
4 Coryandar Gilvary<sup>\*1,2,3,4</sup>, Jamal Elkhader<sup>\*1,2,3,4</sup>, Neel Madhukar<sup>5</sup>, Claire Henschcliffé<sup>6</sup>, Marcus D.  
5 Goncalves<sup>3,7</sup>, Olivier Elemento<sup>1,2,3,4,5,8</sup>

6  
7 <sup>1</sup> HRH Prince Alwaleed Bin Talal Bin Abdulaziz Alsaud Institute for Computational Biomedicine,  
8 Dept. of Physiology and Biophysics, Weill Cornell Medicine, New York, NY 10065, USA;

9 <sup>2</sup> Caryl and Israel Englander Institute for Precision Medicine, Weill Cornell Medicine, New York,  
10 NY 10065, USA;

11 <sup>3</sup> Sandra and Edward Meyer Cancer Center, Weill Cornell Medicine, New York, NY 10065, USA;

12 <sup>4</sup> Tri-Institutional Training Program in Computational Biology and Medicine, New York, NY 10065,  
13 USA;

14 <sup>5</sup> OneThree Biotech, New York, NY 10021, USA

15 <sup>6</sup> Department of Neurology, Weill Cornell Medicine, New York, NY 10065

16 <sup>7</sup> Division of Endocrinology, Department of Medicine, Weill Cornell Medicine, New York, NY  
17 10065

18 <sup>8</sup> WorldQuant Initiative for Quantitative Prediction, Weill Cornell Medicine, New York, NY 10065,  
19 USA;

20 \*These authors contributed equally

21 Correspondence: [ole2001@med.cornell.edu](mailto:ole2001@med.cornell.edu) (Olivier Elemento)

## 22 23 **Abstract**

24 Drug repurposing, identifying novel indications for drugs, bypasses common drug  
25 development pitfalls to ultimately deliver therapies to patients faster. However,  
26 most repurposing discoveries have been led by anecdotal observations (e.g.  
27 Viagra) or experimental-based repurposing screens, which are costly, time-  
28 consuming, and imprecise. Recently, more systematic computational  
29 approaches have been proposed, however these rely on utilizing the information  
30 from the diseases a drug is already approved to treat. This inherently limits the  
31 algorithms, making them unusable for investigational molecules. Here, we  
32 present a computational approach to drug repurposing, CATNIP, that requires  
33 only biological and chemical information of a molecule. CATNIP is trained with  
34 2,576 diverse small molecules and uses 16 different drug similarity features,  
35 such as structural, target, or pathway based similarity. This model obtains  
36 significant predictive power (AUC = 0.841). Using our model, we created a  
37 repurposing network to identify broad scale repurposing opportunities between  
38 drug types. By exploiting this network, we identified literature-supported  
39 repurposing candidates, such as the use of systemic hormonal preparations for  
40 the treatment of respiratory illnesses. Furthermore, we demonstrated that we can  
41 use our approach to identify novel uses for defined drug classes. We found that  
42 adrenergic uptake inhibitors, specifically amitriptyline and trimipramine, could be  
43 potential therapies for Parkinson's disease. Additionally, using CATNIP, we  
44 predicted the kinase inhibitor, vandetanib, as a possible treatment for Type 2  
45 Diabetes. Overall, this systematic approach to drug repurposing lays the  
46 groundwork to streamline future drug development efforts.

47

## 48 **Introduction**

49 With over \$800 million spent bringing a single drug to market over the course of  
50 15 years, drug development has remained a costly and time-consuming affair<sup>1</sup>. In  
51 response, there has been an increase in interest in drug repurposing, the  
52 identification of novel indications for known, safe drugs. Successes in this area  
53 have been seen in the past, most notably in sildenafil (e.g. Viagra), which was  
54 originally intended to treat hypertension and angina pectoris but was later  
55 repurposed to treat erectile dysfunction. Other examples of compounds  
56 repurposed for new therapeutic applications include minoxidil<sup>2</sup> and raloxifene<sup>3</sup>,  
57 which are now used to treat androgenic alopecia and osteoporosis, respectively.  
58 However, most of these repurposing opportunities were discovered through  
59 inefficient approaches including anecdotal observations or hypothesis-driven  
60 investigations, and a more efficient approach could lead to many more  
61 repurposing opportunities.

62  
63 Computational approaches for repurposing drugs are appealing in that they can  
64 be systematically and quickly applied to many drugs at a low cost compared to  
65 their experimental counterparts. One computational approach that has proven to  
66 be invaluable in other areas of the drug development pipeline is machine  
67 learning. Machine learning is the use of computational algorithms to learn from  
68 available data to make novel predictions and gain new insight. Using this  
69 technique, one can create unbiased algorithms to match seemingly disparate  
70 drugs by comparing their common features<sup>4</sup>, such as clinical indication, toxicity  
71 profile<sup>5</sup> or therapeutic target<sup>6,7</sup>. Previously, our lab used a ‘similarity’ approach,  
72 leveraging the principle that similar drugs tend to have similar characteristics, to  
73 predict a drug’s target by investigating the known targets of other drugs that were  
74 predicted to be “similar” to the investigated drug based on shared features<sup>6</sup>. We  
75 found that DRD2, a dopamine receptor, was the predicted target for the  
76 compound ONC201. After identifying and experimentally validating this target,  
77 clinical trials were shifted to focus on gliomas, which are now successfully  
78 completing phase two trials at the time of this publication<sup>8</sup>. The approach of

79 leveraging drug similarity could immensely aid drug repurposing efforts with the  
80 appropriate data.

81

82 Others have successfully used this ‘similarity’ approach to repurpose drugs and  
83 demonstrated high predictive power when tested against FDA approved drug-  
84 diseases<sup>9</sup>. However, these methods have primarily linked drugs together using a  
85 disease-centric approach instead of using features related to the drug itself (i.e.  
86 drug-centric). These repurposing opportunities are identified by predicting  
87 diseases similar to the diseases a drug is already known to treat. Disease  
88 similarities can be based on semantic, pathophysiological, or clinical similarities  
89 related to the drug’s clinical indication. For example, PREDICT, a repurposing  
90 method developed by Gottlieb et al.<sup>10</sup>, exploits the semantic similarity of disease  
91 terms as a form of disease-disease similarity. Such approaches, while reliable,  
92 limit the scope of the repositioning effort in several ways. First, the vast majority  
93 of small molecules never reach clinical approval and would be overlooked in this  
94 type of analysis. Second, the use of a disease-centric approach biases  
95 repurposing predictions toward exclusively similar clinical diseases (i.e.: cancer  
96 drugs to other cancer types)<sup>11</sup>. We postulated that using solely drug information,  
97 such as chemical and biological features, would be a more effective and broader  
98 approach to drug repurposing.

99

100 Here, we propose a novel approach to drug repurposing, which operates by a  
101 platform we call, **Creating A Translational Network for Indication Prediction**  
102 (CATNIP). CATNIP is a machine-learning algorithm that learns to predict whether  
103 two molecules share an indication based solely on the drug’s chemical and  
104 biological features, using 2,576 unique drugs. The systematic application of  
105 CATNIP to molecule pairs creates a network with ~4.6 million nodes that can  
106 then be used to identify potential drug repurposing opportunities. Because  
107 CATNIP uses chemical structure and targets as key features, it can effectively  
108 bridge between different therapeutic indications. In this report, we have identified  
109 various candidate drug classes that are predicted to have therapeutic activity

110 outside of their intended indication in diseases such as Parkinson's disease and  
111 Type 2 Diabetes.

112

## 113 **Results**

114

### 115 ***Variance in drug indication nomenclature can be standardized***

116 We collected a wide variety of drugs (N=3,066, including both approved and  
117 investigational molecules) with a diverse set of indications to ensure that our drug  
118 network covered a large portion of the known chemical space. A subset of these  
119 drugs (2,576 FDA approved drugs and 2,492 indications taken from DrugBank<sup>12</sup>)  
120 were used as a gold-standard of drug-indication associations in the training set  
121 for the model. Disease names are often not standardized, which can lead to  
122 many diverse names for the same disease. This problem leads to many drug  
123 pairs appearing to not have shared indications, when they are associated with  
124 two different names for the same disease. To address inconsistencies in  
125 nomenclature for drug indications, such as "prostate carcinoma" and "carcinoma  
126 of the prostate", the MetaMap tool<sup>13</sup> was applied (**Methods**). Using MetaMap, we  
127 clustered the 2,492 DrugBank indications into 1,042 standardized indications. A  
128 multitude of indication types were included in this standardization including, but  
129 not limited to, oncological, mental health, and neurological diseases (**Figure**  
130 **S1A**). Our rigorous standardization of drug indications ensured an accurate  
131 training set, allowing for the discovery and modeling of drug-indication  
132 relationships.

133

### 134 ***Drug pairs sharing indications have other similar characteristics***

135 We hypothesized that pairs of drugs that shared at least one indication would  
136 have other similar drug characteristics (**Table S1**). To test this hypothesis, we  
137 integrated the similarity of two drugs across chemical and biological drug  
138 properties, and created a computational model to predict if two drugs will share  
139 an indication (**Figure 1**). All 16 of the drug similarity features (**Table S1**) collected  
140 could significantly distinguish between drug pairs known to share an indication

141 and those not known to share an indication (**Figure S2-5**). For example, we  
142 found that drug pairs with a shared clinical indication, according to their listed  
143 DrugBank indications, tended to have significant overlap in targets (D-statistic =  
144 0.168, p-value < 0.001, **Figure S2A**). The feature which best discriminated  
145 between drug pairs that shared a clinical indication versus drug pairs that do not  
146 was the similarity between the KEGG pathways that each drug's targets are  
147 involved in (D-statistic = 0.241, p < 0.001, **Figure S4C**). Pathway similarity was  
148 calculated as the Jaccard Index between the KEGG pathways that contain each  
149 drug's gene targets (**Methods**). The difference in effect size between the target  
150 similarity and the pathway similarity (D-statistic= 0.168 vs 0.241, respectively)  
151 indicates that the drugs do not necessarily have to target the same exact genes,  
152 but rather the same biological pathway, in order to share a clinical indication.  
153 Additionally, we found that drug pairs that share an indication had a more similar  
154 chemical structure than drug pairs that did not share an indication (D-statistic =  
155 0.105, p-value < 0.001, **Figure S5A**). Overall, these features seem to indicate  
156 sufficient power in differentiating drugs that share and do not share indications,  
157 which we hypothesized can then be leveraged to create a predictive model.

158

### 159 ***Drug pairs that share indications can be predicted by model***

160 Using these diverse drug properties as features we trained a Gradient Boosting  
161 model to predict if two drugs share a clinical indication. A Gradient Boosting  
162 model showed superior results when compared with other algorithms (**Methods**,  
163 **Table S2**). The model output is a drug similarity score (hereby referred to as a  
164 "CATNIP score"), which allows us to classify drug pairs that share clinical  
165 indications. We performed a 5-fold cross-validation analysis and achieved  
166 significant predictive performance with an area-under-the-receiver-operator curve  
167 (AUC) of 0.841 (**Figure 2A**). We confirmed the statistical significance of our  
168 model with a precision-recall curve (PRC) because of the class imbalance in our  
169 dataset between drug pairs that share indications against those that do not  
170 (23,840 Shared, 1,299,623 Not Shared). When compared to random predictions,

171 our model showed significant improvement (0.189 vs 0.0184 area-under PRC,  
172 **Figure S6**).

173

174 It has been shown before that structurally similar drugs have a high probability of  
175 treating the same indication<sup>15</sup>. However, there are many examples of drug pairs  
176 that defy this rule. For example, tamoxifen<sup>16</sup> and anastrozole<sup>17</sup> are structurally  
177 dissimilar compounds (Dice similarity = 0.372) that treat the same indication  
178 (Metathesaurus term: Cancer, Breast). To ensure that our model could  
179 accurately classify drug pairs that share an indication but are not structurally  
180 similar, we recalculated all performance metrics to control for high and low  
181 structural similarity. High performance was retained under both of these  
182 conditions (high structural similarity AUC = 0.885, low structural similarity AUC =  
183 0.828 AUC, **Figure 2A**). These performance metrics confirm that our model is  
184 robust enough to predict if a drug pair will share an indication with or without  
185 structural similarity.

186

### 187 ***Network clusters identify drugs with similar clinical characteristics***

188 We constructed a repurposing network by calculating a CATNIP score for all  
189 possible drug pairs found within DrugBank, and assigning the drugs as nodes  
190 and the CATNIP score as the edge weight. We pruned the network using a cut-  
191 off value of 7.4 for the CATNIP scores (**Figure 2B**), which included 792 different  
192 drug pairs. This cut-off is equivalent to a predicted probability of >99% to share  
193 an indication and allowed for a balance between confidence within our  
194 predictions and drug diversity and availability.

195

196 We hypothesized that drugs sharing at least one indication would cluster together  
197 in our network. To confirm this theory, we classified each drug per its 1st order  
198 Anatomical Therapeutic Chemical (ATC) classification. This identification is a  
199 method of distinguishing the clinical use of a drug that is widely used in European  
200 and North American chemoinformatics databases<sup>18</sup>. Using ATC, we observed  
201 clearly defined clusters within the repurposing network (**Figure 2B**). Many



202 clusters featured multiple ATC classifications, suggesting potential repurposing  
203 opportunities. For example, one cluster included the thiazolidinediones,  
204 rosiglitazone and pioglitazone (ATC classification: ‘Alimentary Tract and  
205 Metabolism’) and the fibrates, fenofibrate and bezafibrate (ATC classification:  
206 ‘Cardiovascular system’). These two clustered ATC classifications were  
207 connected by a high (7.42) CATNIP score between bezafibrate and pioglitazone,  
208 an antidiabetic drug; a relationship driven by the shared targeting of PPAR $\alpha$  and  
209 PPAR $\gamma$  resulting in the improvement of lipid and glucose metabolism. Bezafibrate  
210 has shown efficacy in the treatment of Type 2 Diabetes in numerous  
211 retrospective and pre-clinical studies, including Phase 2 trials<sup>19-21</sup>, however is still  
212 not an approved antidiabetic. The identification of bezafibrate as a potential  
213 diabetes treatment is a key example of how CATNIP can be used to identify  
214 repurposing opportunities.

215

216 We reasoned that the connections between ATC classifications across all the  
217 drug clusters could provide additional aid for drug repurposing purposes. Using  
218 the pruned network (CATNIP Score > 7.4), we collected all the scores between  
219 drugs of differing ATC classifications. From this collection, we were able to  
220 determine the median score associated between each pair of ATC  
221 classifications. The ATC classifications with the highest median CATNIP scores  
222 had literature support for numerous repurposing efforts between them (**Table 1**).  
223 For example, drugs with the ATC classifications of “Respiratory System” and  
224 “Systemic Hormonal Preparations, excluding sex hormones and insulins” were  
225 strongly connected to each other (7.97 median CATNIP score). This connection  
226 was driven by highly scored pairs of drugs including rimexolone to mometasone  
227 (8.31 CATNIP score) and prednisone to triamcinolone (8.13 CATNIP score).  
228 These connections are supported by the fact that hormonal agents like  
229 glucocorticoids and beta adrenergic agonists have been used for decades to  
230 relax the airway musculature in patients with reactive airways disease and  
231 chronic obstructive pulmonary disease<sup>22</sup>. Interestingly, our analysis identified  
232 glucagon, a peptide hormone that increases blood glucose levels, as a candidate

233 for “Respiratory System” repurposing and this use already has clinical  
234 support<sup>23,24</sup>. Additionally, drugs classified as “Respiratory System” and  
235 “Dermatological” were also observed to be highly associated because of  
236 interactions such as the one between ciclesonide and hydrocortisone (8.43  
237 CATNIP score). Ciclesonide and hydrocortisone do in fact share a clinical  
238 indication, “Asthma Bronchial”, giving added confidence to our findings. These  
239 types of network observations are important in laying the groundwork for  
240 suggesting novel clinical repurposing strategies for FDA-approved drugs.

241

### 242 ***CATNIP identifies novel disease areas for drug classes***

243 We investigated the ability to leverage CATNIP scores to identify repurposing  
244 opportunities by evaluating specific drug classes. Drug classes are predefined in  
245 DrugBank. In order to identify actionable repurposing possibilities, we narrowed  
246 this list down to 50 classes containing inhibitors, antagonists, or agonists of  
247 specific gene or protein families. We focused our attention on specific disease  
248 areas that are attractive for drug repurposing opportunities, due to a lack of  
249 current treatments or high rates of acquired resistance. The specific disease  
250 areas were: “mental disorders”, “neurological diseases”, “diabetes”, and “cancer”  
251 (cancer was further divided into specific cancer types due to the large variance in  
252 disease pathology between types, **Methods**). We hypothesized that CATNIP  
253 scores could be used to identify specific drug classes that would be efficacious  
254 for a new disease area. For each drug class and disease area, we found the  
255 statistical difference in the CATNIP score distribution between two sets of drug  
256 pairs. The first set included pairs that had one drug within the drug class and the  
257 other drug approved for the disease in question, while the other set included drug  
258 pairs that had one drug within the drug class and the other drug not approved for  
259 the disease in question (**Methods**). We compared the effect size, estimated by  
260 the Wilcoxon location shift, for all drug class-disease pairs that had a significant  
261 difference in distribution compared to drug class-non-disease pairs (FDR < 0.1,  
262 **Figure 3A-B, Figure S7-8**). By using CATNIP scores, we found that many well-  
263 known drug class-diseases associations could be recovered. For example,



264 “muscarinic antagonists” were highly ranked for “neurological diseases” and  
265 many such agents are FDA-approved for this indication<sup>25</sup>. In addition, we found  
266 that “kinase inhibitors” were closely associated with the treatment of cancer and  
267 “dopamine antagonists” for the treatment of “mental disorders”<sup>26, 27</sup> (Wilcoxon  
268 Location Shift = 0.711-0.945 for “kinase inhibitors” and select cancer types,  
269 Location Shift = 0.882 for “dopamine antagonists” and “mental disorders”, p-  
270 value < 0.001, **Figure S9**). In fact, almost all drug class-disease associations  
271 contained at least one FDA-approved drug for the respective disease, giving us  
272 added confidence in our model. Of note, each drug was allowed to be  
273 categorized into numerous drug classes, leading to unexpected, yet easily  
274 explained, results; for example, “dopamine antagonists” appearing as a top drug  
275 class for “neurological diseases”. This is due to risperidone, a drug traditionally  
276 used for schizophrenia and mood disorders, also having a secondary indication  
277 of Alzheimer’s type severe dementia.

278

279 Next, we further interrogated the drug classes associated with “neurological  
280 diseases” and “diabetes”, specifically. CATNIP scores were able to correctly  
281 identify almost all drug classes known to treat these diseases (**Figure 3A-B**). To  
282 identify possible repurposing candidates, we focused our attention on drug  
283 classes shown to have a large positive effect size with this CATNIP analysis but  
284 are not currently approved for treatment. For “neurological diseases”, the use of  
285 adrenergic uptake inhibitors, traditionally used as antidepressants, was the top  
286 repurposing candidate (**Figure 3A**). For “diabetes” alpha 1 antagonists and  
287 kinase inhibitors were identified as possible novel treatments for diabetes  
288 (**Figure 3B**). We believe further investigation into these drug classes and  
289 diseases could lead to successful clinical applications.

290

### 291 ***CATNIP interpretability reveals reasoning for repurposing candidates***

292 From our list of repurposing candidates, we chose two novel drug class-disease  
293 associations to further investigate.

294

295 *Adrenergic uptake inhibitors applied to Parkinson's disease*

296

297 First, we evaluated the relationship between “neurological diseases” and  
298 “adrenergic uptake inhibitors”. We focused on the drug pairs with the highest  
299 CATNIP scores, i.e. those predicted with the highest confidence to share at least  
300 one indication (**Figure 3C**). Of all the adrenergic uptake inhibitors, we found that  
301 amitriptyline and trimipramine, two anti-depressants, had the highest CATNIP  
302 scores with the “neurological diseases” drugs. The drugs that shared the  
303 strongest connections with amitriptyline and trimipramine were drugs approved  
304 for Parkinson's disease (PD). Specifically, metixene, atropine, pergolide and  
305 benztropine were associated with amitriptyline, according to CATNIP, and  
306 trimipramine was associated to benztropine and rotigotine. Trimipramine was  
307 also strongly connected with orphenadrine, which is sometimes used off label in  
308 PD, but will not be included in the following analyses.

309

310 Using the CATNIP model, we evaluated which features contributed towards the  
311 prediction of amitriptyline and trimipramine to share an indication with PD drugs.  
312 We found that target, gene ontology, and pathway similarity all strongly  
313 contributed to the predictions for both amitriptyline and trimipramine (**Figure 3D**,  
314 **Figure S10**). Since target similarity and distance between targets (in a protein-  
315 protein interaction network) were among the top contributing features, we  
316 investigated which gene targets were shared amongst these drug pairs. We  
317 found that amitriptyline targets three specific gene classes that are also targeted  
318 by at least one of the PD drugs: muscarinic acetylcholine receptors, G-coupled  
319 protein receptors (GPCRs), and alpha adrenergic receptor. Trimipramine also  
320 targets muscarinic acetylcholine receptors, alpha-adrenergic receptors, and  
321 dopamine transporters, which is similar to benztropine, a PD drug. All these  
322 receptors have well-defined relationships with PD and other neurological  
323 diseases<sup>25, 28, 29</sup>, which adds support for repurposing amitriptyline and/or  
324 trimipramine.

325

326 Amitriptyline may be an ideal candidate for use in PD patients. We evaluated the  
327 shared molecular function gene ontology terms shared between amitriptyline and  
328 all four PD drugs. GPCR activity was once again identified (**Supplementary**  
329 **Data**). We then interrogated the biological pathways these drug targets are  
330 involved in and found many broad GPCR pathways overlapping between  
331 amitriptyline and the PD drugs (**Figure S11**) including the Reactome pathway  
332 “GASTRIN\_CREB\_SIGNALLING PATHWAY VIA PKC AND MAPK”. Several  
333 recent studies support the link between gastrin-releasing peptide signaling to  
334 brain function<sup>30</sup>. Through CATNIP, we have identified “adrenergic uptake  
335 inhibitors” like amitriptyline and trimipramine as a possible treatment for PD.

336

### 337 *Kinase inhibitors applied to Diabetes*

338 Our CATNIP analysis identified an opportunity to repurpose “kinase inhibitors” for  
339 the treatment of diabetes (**Figure 3B**). Of the drug pairs evaluated in this context,  
340 the link between vandetanib, a thyroid cancer drug, and gliclazide, a Type 2  
341 diabetes drug (CATNIP Score = 6.39, **Figure 3E**) was the strongest. This  
342 association was driven by target similarity and similarity between KEGG  
343 pathways of the drug targets (**Figure 3F**). Vandetanib and gliclazide have an  
344 overlapping target, VEGFA. Several KEGG pathways are shared between  
345 vandetanib and gliclazide including the “Cytokine cytokine receptor interaction”  
346 pathway (**Supplementary Data**). This pathway contains VEGFA, the shared  
347 target, and the epidermal growth factor receptor (EGFR), another one of  
348 vandetanib’s targets. The similarity between these two drug’s targets and  
349 pathway effects leads us to believe there is strong potential for vandetanib to be  
350 repurposed.

351

### 352 **Discussion**

353 Although considerable improvements have been made in drug repurposing  
354 efforts over the past decade, the use of previous disease associations will  
355 eventually curtail these improvements due to the imposed restriction of previous  
356 knowledge. Our new approach, CATNIP, could provide a highly effective aid to

357 drug repurposing endeavors. Here, we accurately predicted drugs that shared an  
358 indication, while keeping high levels of both sensitivity and specificity. Leveraging  
359 our prediction metric enabled us to generate a network for repurposing,  
360 identifying, and repurposing predictions based on system-wide drug scopes.

361

362 The CATNIP method allows for broad-scale drug repurposing opportunities to be  
363 readily identified. By identifying and interpreting our drug similarity features, we  
364 can investigate the possible mechanisms behind these repurposing candidates.  
365 The benefit of using drug similarity features is two-fold. First, these features are  
366 readily available for both approved and investigational drugs, which have been  
367 underserved by previous repurposing methods. Second, the interpretability of the  
368 features allows us to identify possible mechanisms of action when we back  
369 engineer what contributed to high CATNIP scores.

370

371 We found strong support for repurposing amitriptyline and trimipramine, both of  
372 which are in clinical use as anti-depressants, for PD. These drugs have many  
373 functions in addition to being adrenergic uptake inhibitors, such as serotonin  
374 blockers, anticholinergics, and the mechanisms overlapping with current PD  
375 drugs described above. Movement Disorders Society guidelines found  
376 insufficient evidence to support the use of amitriptyline for depression in PD<sup>31</sup>  
377 and a published Practice Parameter found only level C evidence for its use<sup>32</sup>.  
378 However, amitriptyline has been commonly used for not only depression but  
379 other off-label indications in neurological disorders, including pain<sup>33</sup>. While clinical  
380 trials have been conducted for the effect of amitriptyline on depression in PD  
381 patients<sup>34</sup>, currently there are no trials evaluating amitriptyline or trimipramine as  
382 a treatment for other symptoms and signs of PD. There have, however, been  
383 preclinical studies evaluating amitriptyline as a potential therapy for PD. In rodent  
384 models of PD, amitriptyline affects levels of neurotrophic factors including  
385 BDNF<sup>35</sup> and decreases dopamine cell loss in these models<sup>36, 37</sup>. It has been  
386 suggested to mitigate microglial inflammation<sup>38</sup>. Moreover, with the suggestion

387 that amitriptyline may have shorter term symptomatic motor benefit, it may  
388 enhance levodopa efficacy<sup>39</sup>.

389

390 When we more closely evaluated trimipramine, we found compelling evidence  
391 this could be a potential PD therapeutic. Specifically, the targets of trimipramine  
392 make it a potentially strong therapeutic to combat loss of motor function amongst  
393 PD patients. This benefit is due to the dual targeting of DRD2 and alpha 2  
394 adrenergic receptors, which is similar to piribedil, an investigational PD  
395 medication that was not included within our final CATNIP network due to a lack of  
396 available information. In a review of piribedil, it was highlighted that the agonistic  
397 D2/D3 activity combined with alpha 2 adrenergic antagonism can lead to  
398 preservation of motor function<sup>40</sup>. However, further research must be done to  
399 better understand the exact effects that trimipramine has on both dopamine and  
400 alpha 2 adrenergic receptors. Further research into trimipramine could quickly  
401 lead to a clinical trial for PD patients with specific motor function end points.

402

403 We also identified a repurposing opportunity with kinase inhibitors for the  
404 treatment of diabetes, due to the strong predicted connection between  
405 vandetanib, a thyroid cancer drug, and gliclazide. While there have been some  
406 preclinical animal studies investigating the use of kinase inhibitors in diabetes<sup>41</sup>,  
407 <sup>42</sup>, to our knowledge, there has yet to be an approved kinase inhibitor for the  
408 treatment of diabetes. Both vandetanib and gliclazide are known to target  
409 VEGFA, which has shown a clear connection to diabetes pathology<sup>43</sup> and  
410 treatment<sup>44</sup>. Additionally, Hagberg et al. published work suggesting that  
411 antagonism of VEGFB, a gene within the same pathway as VEGFA, improves  
412 insulin sensitivity and increases skeletal muscle glucose uptake in *db/db* mice<sup>45</sup>.  
413 Because vandetanib targets VEGFR1<sup>46</sup>, the receptor VEGFB binds, it could also  
414 have insulin sensitizing effects. Further experimental work is required to verify  
415 this hypothesis<sup>47</sup>.

416

417 Besides the targeting of VEGFA/VEGFR1, vandetanib's target EGFR can also  
418 potentially help diabetes pathology. Inflammatory cytokines (including, but not  
419 limited to, IL-8 and TNF- $\alpha$ ) have been shown to be associated with the  
420 progression of diabetic neuropathy<sup>48</sup>. The inhibition of EGFR through the use of a  
421 kinase inhibitor in past work has reduced the expression of both to IL-8 and TNF-  
422  $\alpha$  in rats<sup>49</sup>. Therefore, we believe vandetanib could be considered as a potential  
423 diabetes treatment, due to its ability to target EGFR leading to a possible  
424 decrease in inflammatory cytokine production.

425

426 In addition to the exciting predicted repurposing opportunities we have chosen to  
427 highlight, many other drug classes showed significant repurposing potential for  
428 mental disorders, neurological diseases, and several different cancer types.  
429 While diving into each of these opportunities is outside the scope of this paper,  
430 we hope that researchers take it upon themselves to further investigate these  
431 candidate drug class-disease associations.

432

433 It is important to acknowledge certain limitations to CATNIP, such as data  
434 availability and the application to rare diseases. Although this model does not  
435 rely on disease similarity information, it does require known molecular target  
436 information to obtain peak predictive power. This target information can  
437 frequently be unavailable for early stage compounds. Additionally, this method  
438 would have limited use when searching for drugs to be repurposed for diseases  
439 with very few or no clinically approved compounds.

440

441 To our knowledge, CATNIP is the first method capable of predicting a novel  
442 indication for a drug without relying on disease similarities. Many predictions  
443 gained from CATNIP have substantial preclinical research or mechanistic  
444 support, suggesting that other predictions may also provide valuable information  
445 for future investigations. Due to its demonstrated ability to identify large scale  
446 drug repurposing opportunities, CATNIP will likely serve as a significant basis  
447 towards a bright future in drug repurposing efforts.



448

## 449 **Methods**

450

### 451 ***Indication Mapping***

452 Using a custom Python script, we webscraped DrugBank 5.0<sup>50</sup> for drug  
453 compound names and indication information with a total of 3066 drugs being  
454 found. Indication information were run through the Unified Medical Language  
455 System (UMLS) tool, MetaMap<sup>13</sup>, to match DrugBank assigned indications to  
456 MESH IDs and UMLS Concept Unique Identifiers (CUIs). MetaMap is a  
457 computational approach that combines linguistic and natural language  
458 processing techniques to map biomedical texts to the UMLS Metathesaurus.  
459 MetaMap has previously been shown to successfully exceeded human mapping  
460 capabilities<sup>14</sup>. Using a custom Python script we identified synonym candidate to  
461 further improve indication semantics. A random subset of the indications were  
462 manually reviewed and found to correctly map to standardized terms with a 95%  
463 accuracy (**Figure S1B**). We then filtered our list of drugs to the 2576 drugs that  
464 shared at least one indication with another drug.

465

### 466 ***Similarity Feature Collection***

#### 467 *Compound Features*

468 Similarities between drugs were found by creating all possible pairs of the drugs  
469 with known indications. Multiple compound similarity features and drug target  
470 similarity features were collected. The drug targets listed within DrugBank 5.0<sup>50</sup>  
471 were used as our set of 'known targets' for each drug. Additionally, we collected  
472 genomic information about each drug target using MSigDB<sup>51, 52</sup>. The features,  
473 sources and metrics used to measure similarity are listed in **Supplementary**  
474 **Table 1**. The measures of similarity included, but were not limited to, Pearson  
475 Correlation, Jaccard Index, and Dice Similarity. In cases where there was  
476 insufficient or missing information, features were imputed by using the median  
477 value for that feature in drug pairs with complete information.

478

479 *Network Features*

480 We curated a biological network that contains 22,399 protein-coding genes,  
481 6,679 drugs, and 170 TFs. The protein-protein interactions represent established  
482 interaction<sup>53-55</sup>, which include both physical (protein-protein) and non-physical  
483 (phosphorylation, metabolic, signaling, and regulatory) interactions. The drug-  
484 protein interactions were curated from several drug target databases<sup>55</sup>.

485

486 ***Statistical Analysis***

487 For each similarity feature, a Kolmogorov-Smirnov (KS) test was performed  
488 between the set of drug pairs that shared an indication and those that did not  
489 share an indication. The KS test was chosen to identify non-linear predictive  
490 power. In addition, the Pearson correlation between all numeric features was  
491 calculated. These tests were performed using custom scripts in R statistical  
492 software<sup>56</sup>.

493

494 ***Model Building***

495 We trained a two-class classifier predictive model using the features described  
496 above. Our classes were determined as a binary of “shared” or “non-shared”  
497 indication. Drugs were only included if they shared an indication with at least one  
498 other drug. A 5-fold cross-validation gradient boosting model was used after  
499 careful model selection and implemented using the XGBoost package<sup>57</sup> within  
500 the R statistical software. Additional models that were tested and compared  
501 using the AUC and AUPRC of 5-fold cross-validation were: Support Vector  
502 Machine with a radial kernel model, logistic regression with elastic net and  
503 logistic regression with lasso, all using custom R scripts. A custom-made R script  
504 was used to implement a grid-search to optimize the hyperparameters of our  
505 model. Our model objective was a logistic regression for binary classification and  
506 we output a score pre-logistic transformation. The class size of “shared” vs. “non-  
507 shared” was imbalanced, therefore we applied downsampling to each fold of  
508 training via the R package Caret<sup>58</sup>.

509

## 510 ***Classification Evaluation***

511 For evaluating the model performance on predicting if two drugs share an  
512 indication, receiver operating characteristic (ROC) and precision-recall curve  
513 (PRC) curves were created in R using the pROC<sup>59</sup> and precrec<sup>60</sup> packages  
514 respectively. The raw-logistic values were normalized on a scale from 0-1 to  
515 enable easier interpretation and ROC/PRC calculation. Area-under-the-ROC  
516 curve (AUC) and area-under-the-PRC (AUPRC) scores were used to evaluate  
517 model performance.

518

## 519 ***Drug Similarity Network***

### 520 *Network Construction*

521 We constructed a drug similarity network based upon our classifier results with  
522 drugs as nodes and our raw model output as the edge weight. This network was  
523 visualized using the visNetwork package<sup>61</sup> and used in analyses using the iGraph  
524 package<sup>62</sup> within R<sup>56</sup>.

525

### 526 *ATC Repurposing Analysis*

527 The Anatomical Therapeutic Chemical (ATC) code for all drugs were found in  
528 DrugBank<sup>50</sup>, and the highest level code was assigned. Drugs with multiple ATC  
529 codes assigned to them were re-assigned into the category “Various”. A circular  
530 repurposing network was created with ATC codes as the nodes using the  
531 iGraph<sup>62</sup> and gGraph<sup>63</sup> packages with R<sup>56</sup>. The graph edge weights were based  
532 on the mean classifier output between all drugs of each ATC code category. To  
533 reduce noise within the repurposing network an initial cut-off of drug pairs with a  
534 classifier output of 7.4 and above was implemented, leaving 792 drug pairs to  
535 examine. Manual literature searches were used to validate repurposing  
536 opportunities.

537

### 538 *Drug Class Repurposing Analysis*

539 Drug classes for all drugs were found in DrugBank<sup>50</sup> and were filtered to include  
540 only “inhibitor”, “antagonist,” and “agonist” classes that had at least 20 drugs, to

541 ensure enough statistical power. Additionally, we identified four main disease  
542 areas of interest: “mental disorders”, “neurological diseases”, “diabetes”, and  
543 “cancer”. The UMLS<sup>13</sup> sematic codes “modb” and “neop” were used to identify  
544 indications falling within mental disorders and cancer, respectively. Cancer was  
545 further refined into different cancer types based on a keyword search in a custom  
546 Python script. All UMLS concept IDs containing the word “diabetes” were  
547 included within the diabetes category. For “neurological diseases”, we refined our  
548 list to only include Parkinson’s Disease, Alzheimer’s, Epilepsy, and Dementia, to  
549 balance both specificity in disease type and enough drugs to make statistically  
550 sufficient sample size.

551  
552 Wilcox-Mann-Whitney tests between all drug class-disease associations were  
553 performed. The test specifically tested if the mean of the CATNIP scores of drug  
554 pairs with one drug being a member of the class of interest and the other being  
555 approved for the disease of interest were significantly different than the mean of  
556 the CATNIP scores of all drug pairs that included one drug within the class of  
557 interest and the other drug not being approved for the diseases of interest. A  
558 positive location shift meant that drug class-disease pairs had significantly higher  
559 CATNIP scores than drug class-non-disease pairs. A FDR multiple hypothesis  
560 correction was applied.

561  
562 *CATNIP Feature Effect Analysis*

563 The effect of each feature on the CATNIP score for specific drug pairs was found  
564 by iteratively changing the feature value to the median value of that feature for all  
565 drug pairs. Since the clear majority of all drug pairs do not share an indication  
566 this is the best approximate for that feature having no contribution to the CATNIP  
567 score. The difference in the new CATNIP score and the correct CATNIP score  
568 was then measured.

569  
570

571 ***Acknowledgements***

572 C.M.G., J.E, N.S.M., and O.E. conceived, designed and developed the  
573 methodology for this work. C.M.G., J.E., and O.E. analyzed and interpreted the  
574 data. C.M.G. executed the machine learning analyses. C.M.G. and J.E. wrote  
575 the initial draft of the manuscript. M.D.G. provided expertise within diabetes, as  
576 well as other clinical aspects of the paper. C.H. provided expertise within  
577 Parkinson's Disease, as well as other clinical aspects of the paper. O.E.  
578 supervised the study. All the authors reviewed and approved the manuscript.  
579

## 580 References

- 581 1. Adams, C.P. & Brantner, V.V. Estimating The Cost Of New Drug Development:  
582 Is It Really \$802 Million? *Health Affairs* **25**, 420-428 (2006).
- 583 2. Ishida, J., Konishi, M., Ebner, N. & Springer, J. Repurposing of approved  
584 cardiovascular drugs. *Journal of Translational Medicine* **14**, 269 (2016).
- 585 3. Goldstein, S.R. et al. Raloxifene use in clinical practice: efficacy and safety.  
586 *Menopause* **16**, 413-421 (2009).
- 587 4. Chiang, A.P. & Butte, A.J. Systematic evaluation of drug-disease relationships  
588 to identify leads for novel drug uses. *Clinical pharmacology and therapeutics*  
589 **86**, 507-510 (2009).
- 590 5. Gayvert, K.M., Madhukar, N.S. & Elemento, O. A Data-Driven Approach to  
591 Predicting Successes and Failures of Clinical Trials. *Cell chemical biology* **23**,  
592 1294-1301 (2016).
- 593 6. Madhukar, N.S. et al. A New Big-Data Paradigm for Target Identification and  
594 Drug Discovery. *bioRxiv*, 134973 (2017).
- 595 7. Madhukar, N.S., Gayvert, K., Gilvary, C. & Elemento, O. A Machine Learning  
596 Approach Predicts Tissue-Specific Drug Adverse Events. *bioRxiv*, 288332  
597 (2018).
- 598 8. McCullough, M. (Philly.com, Web; 2018).
- 599 9. Dudley, J.T., Deshpande, T. & Butte, A.J. Exploiting drug-disease relationships  
600 for computational drug repositioning. *Briefings in bioinformatics* **12**, 303-311  
601 (2011).
- 602 10. Gottlieb, A., Stein, G., Ruppin, E. & Sharan, R. PREDICT: A method for inferring  
603 novel drug indications with application to personalized medicine, Vol. 7.  
604 (2011).
- 605 11. Luo, H. et al. Drug repositioning based on comprehensive similarity measures  
606 and Bi-Random walk algorithm. *Bioinformatics* **32**, 2664-2671 (2016).
- 607 12. Wishart, D.S. et al. DrugBank: a knowledgebase for drugs, drug actions and  
608 drug targets. *Nucleic acids research* **36**, D901-D906 (2008).
- 609 13. Aronson, A.R. Effective mapping of biomedical text to the UMLS  
610 Metathesaurus: the MetaMap program. *Proceedings. AMIA Symposium*, 17-21  
611 (2001).
- 612 14. Pratt, W. & Yetisgen-Yildiz, M. A study of biomedical concept identification:  
613 MetaMap vs. people. *AMIA ... Annual Symposium proceedings. AMIA*  
614 *Symposium* **2003**, 529-533 (2003).
- 615 15. Keiser, M.J. et al. Predicting new molecular targets for known drugs. *Nature*  
616 **462**, 175-181 (2009).

- 617 16. Craig Jordan, V. The role of tamoxifen in the treatment and prevention of  
618 breast cancer. *Current Problems in Cancer* **16**, 134-176 (1992).
- 619 17. Milani, M., Jha, G. & Potter, D.A. Anastrozole Use in Early Stage Breast Cancer  
620 of Post-Menopausal Women. *Clinical medicine. Therapeutics* **1**, 141-156  
621 (2009).
- 622 18. Chen, L., Zeng, W.-M., Cai, Y.-D., Feng, K.-Y. & Chou, K.-C. Predicting  
623 Anatomical Therapeutic Chemical (ATC) classification of drugs by integrating  
624 chemical-chemical interactions and similarities. *PloS one* **7**, e35254-e35254  
625 (2012).
- 626 19. Triolo, M., Annema, W., de Boer, J.F., Tietge, U.J. & Dullaart, R.P. Simvastatin  
627 and bezafibrate increase cholesterol efflux in men with type 2 diabetes.  
628 *European journal of clinical investigation* **44**, 240-248 (2014).
- 629 20. Teramoto, T., Shirai, K., Daida, H. & Yamada, N. Effects of bezafibrate on lipid  
630 and glucose metabolism in dyslipidemic patients with diabetes: the J-  
631 BENEFIT study. *Cardiovascular diabetology* **11**, 29 (2012).
- 632 21. Tenenbaum, A. et al. Effect of bezafibrate on incidence of type 2 diabetes  
633 mellitus in obese patients. *European heart journal* **26**, 2032-2038 (2005).
- 634 22. Pujols, L., Mullol, J. & Picado, C. Alpha and beta glucocorticoid receptors:  
635 relevance in airway diseases. *Current allergy and asthma reports* **7**, 93-99  
636 (2007).
- 637 23. Cavallari, J.M., Jawaro, T.S., Awad, N.I. & Bridgeman, P.J. Glucagon for  
638 refractory asthma exacerbation. *The American Journal of Emergency Medicine*  
639 **35**, 144-145 (2017).
- 640 24. Insuela, D.B.R. et al. Glucagon induces airway smooth muscle relaxation by  
641 nitric oxide and prostaglandin E2. *Journal of Endocrinology* **225**, 205-217  
642 (2015).
- 643 25. Langmead, C.J., Watson, J. & Reavill, C. Muscarinic acetylcholine receptors as  
644 CNS drug targets. *Pharmacology & therapeutics* **117**, 232-243 (2008).
- 645 26. Laruelle, M., Frankle, W.G., Narendran, R., Kegeles, L.S. & Abi-Dargham, A.  
646 Mechanism of action of antipsychotic drugs: from dopamine D2 receptor  
647 antagonism to glutamate NMDA facilitation. *Clinical therapeutics* **27**, S16-S24  
648 (2005).
- 649 27. Zhang, J., Yang, P.L. & Gray, N.S. Targeting cancer with small molecule kinase  
650 inhibitors. *Nature reviews cancer* **9**, 28 (2009).
- 651 28. Perry, E., Smith, C. & Perry, R. Cholinergic nicotinic and muscarinic receptors  
652 in dementia of Alzheimer, Parkinson and Lewy body types. *Journal of Neural*  
653 *Transmission-Parkinson's Disease and Dementia Section* **2**, 149-158 (1990).
- 654 29. Xu, Y. et al. Neurotransmitter receptors and cognitive dysfunction in  
655 Alzheimer's disease and Parkinson's disease. *Progress in neurobiology* **97**, 1-  
656 13 (2012).
- 657 30. Roesler, R. & Schwartzmann, G. Gastrin-releasing peptide receptors in the  
658 central nervous system: role in brain function and as a drug target. *Frontiers*  
659 *in endocrinology* **3**, 159 (2012).
- 660 31. Seppi, K. et al. The Movement Disorder Society evidence-based medicine  
661 review update: treatments for the non-motor symptoms of Parkinson's  
662 disease. *Movement Disorders* **26**, S42-S80 (2011).



- 663 32. Miyasaki, J. et al. Practice Parameter: Evaluation and treatment of depression,  
664 psychosis, and dementia in Parkinson disease (an evidence-based  
665 review):[RETIRED]: Report of the Quality Standards Subcommittee of the  
666 American Academy of Neurology. *Neurology* **66**, 996-1002 (2006).
- 667 33. Frost, J., Okun, S., Vaughan, T., Heywood, J. & Wicks, P. Patient-reported  
668 outcomes as a source of evidence in off-label prescribing: analysis of data  
669 from PatientsLikeMe. *Journal of medical Internet research* **13**, e6 (2011).
- 670 34. Antonini, A. et al. Randomized study of sertraline and low-dose amitriptyline  
671 in patients with Parkinson's disease and depression: effect on quality of life.  
672 *Movement disorders: official journal of the Movement Disorder Society* **21**,  
673 1119-1122 (2006).
- 674 35. Paumier, K.L. et al. Tricyclic antidepressant treatment evokes regional  
675 changes in neurotrophic factors over time within the intact and degenerating  
676 nigrostriatal system. *Experimental neurology* **266**, 11-21 (2015).
- 677 36. Paumier, K.L. et al. Chronic amitriptyline treatment attenuates nigrostriatal  
678 degeneration and significantly alters trophic support in a rat model of  
679 parkinsonism. *Neuropsychopharmacology* **40**, 874 (2015).
- 680 37. Kandil, E.A., Abdelkader, N.F., El-Sayeh, B.M. & Saleh, S. Imipramine and  
681 amitriptyline ameliorate the rotenone model of Parkinson's disease in rats.  
682 *Neuroscience* **332**, 26-37 (2016).
- 683 38. Lauterbach, E.C. Repurposing psychiatric medicines to target activated  
684 microglia in anxious mild cognitive impairment and early Parkinson's  
685 disease. *American journal of neurodegenerative disease* **5**, 29 (2016).
- 686 39. Kamińska, K., Lenda, T., Konieczny, J., Wardas, J. & Lorenc-Koci, E.  
687 Interactions of the tricyclic antidepressant drug amitriptyline with L-DOPA in  
688 the striatum and substantia nigra of unilaterally 6-OHDA-lesioned rats.  
689 Relevance to motor dysfunction in Parkinson's disease. *Neurochemistry*  
690 *international* **121**, 125-139 (2018).
- 691 40. Millan, M.J. From the cell to the clinic: a comparative review of the partial  
692 D2/D3 receptor agonist and  $\alpha$ 2-adrenoceptor antagonist, priribedil, in the  
693 treatment of Parkinson's disease. *Pharmacology & therapeutics* **128**, 229-273  
694 (2010).
- 695 41. Louvet, C. et al. Tyrosine kinase inhibitors reverse type 1 diabetes in  
696 nonobese diabetic mice. *Proceedings of the National Academy of Sciences* **105**,  
697 18895-18900 (2008).
- 698 42. Kikuchi, Y. et al. A Rho-kinase inhibitor, fasudil, prevents development of  
699 diabetes and nephropathy in insulin-resistant diabetic rats. *Journal of*  
700 *Endocrinology* **192**, 595-603 (2007).
- 701 43. Aiello, L.P. et al. Vascular endothelial growth factor in ocular fluid of patients  
702 with diabetic retinopathy and other retinal disorders. *New England Journal of*  
703 *Medicine* **331**, 1480-1487 (1994).
- 704 44. Duh, E. & Aiello, L.P. Vascular endothelial growth factor and diabetes: the  
705 agonist versus antagonist paradox. *Diabetes* **48**, 1899-1906 (1999).
- 706 45. Hagberg, C.E. et al. Targeting VEGF-B as a novel treatment for insulin  
707 resistance and type 2 diabetes. *Nature* **490**, 426 (2012).

- 708 46. Bianco, R. et al. Vascular endothelial growth factor receptor-1 contributes to  
709 resistance to anti-epidermal growth factor receptor drugs in human cancer  
710 cells. *Clinical Cancer Research* **14**, 5069-5080 (2008).
- 711 47. Robciuc, M.R. et al. VEGFB/VEGFR1-induced expansion of adipose  
712 vasculature counteracts obesity and related metabolic complications. *Cell*  
713 *metabolism* **23**, 712-724 (2016).
- 714 48. Navarro-Gonzalez, J.F. & Mora-Fernandez, C. The role of inflammatory  
715 cytokines in diabetic nephropathy. *Journal of the American Society of*  
716 *Nephrology* **19**, 433-442 (2008).
- 717 49. Qu, W.-s. et al. Inhibition of EGFR/MAPK signaling reduces microglial  
718 inflammatory response and the associated secondary damage in rats after  
719 spinal cord injury. *Journal of neuroinflammation* **9**, 178 (2012).
- 720 50. Wishart, D.S. et al. DrugBank 5.0: a major update to the DrugBank database  
721 for 2018. *Nucleic Acids Research* **46**, D1074 (2017).
- 722 51. Subramanian, A. et al. Gene set enrichment analysis: A knowledge-based  
723 approach for interpreting genome-wide expression profiles. *Proceedings of*  
724 *the National Academy of Sciences* **102**, 15545 (2005).
- 725 52. Liberzon, A. et al. Molecular signatures database (MSigDB) 3.0. *Bioinformatics*  
726 **27**, 1739-1740 (2011).
- 727 53. Das, J. & Yu, H. HINT: High-quality protein interactomes and their  
728 applications in understanding human disease. *BMC systems biology* **6**, 92  
729 (2012).
- 730 54. Khurana, E., Fu, Y., Chen, J. & Gerstein, M. Interpretation of genomic variants  
731 using a unified biological network approach. *PLoS computational biology* **9**,  
732 e1002886 (2013).
- 733 55. Aksoy, B.A. et al. PiHelper: an open source framework for drug-target and  
734 antibody-target data. *Bioinformatics* **29**, 2071-2072 (2013).
- 735 56. R Core Team in R Foundation for Statistical Computing. Retrieved from  
736 <http://www.r-project.org/> (Vienna, Austria; 2017).
- 737 57. Chen, T. & Guestrin, C. in Proceedings of the 22nd ACM SIGKDD International  
738 Conference on Knowledge Discovery and Data Mining 785-794 (ACM, San  
739 Francisco, California, USA; 2016).
- 740 58. Kuhn, M. Building Predictive Models in R Using the caret Package. *2008* **28**,  
741 26 (2008).
- 742 59. Robin, X. et al. pROC: an open-source package for R and S+ to analyze and  
743 compare ROC curves. *BMC Bioinformatics* **12**, 77-77 (2011).
- 744 60. Saito, T. & Rehmsmeier, M. Precrec: fast and accurate precision-recall and  
745 ROC curve calculations in R. *Bioinformatics* **33** (1), 145-147 (2017).
- 746 61. Almende, B.V., Thieurmel, B. & Robert, T. visNetwork: Network Visualization  
747 using 'vis.js' Library. *The R Journal* **10**, 251-268 (2018).
- 748 62. Csardi, G. & Nepusz, T. The igraph software package for complex network  
749 research. *InterJournal Complex Systems*, 1695-1695 (2006).
- 750 63. Pedersen, T.L. ggraph: An Implementation of Grammar of Graphics for  
751 Graphs and Networks. **33** (1), 145-147 (2018).
- 752 64. Carter, N.J. Bilastine. *Drugs* **72**, 1257-1269 (2012).

- 753 65. Krause, K., Spohr, A., Zuberbier, T., Church, M.K. & Maurer, M. Up-dosing with  
754 bilastine results in improved effectiveness in cold contact urticaria. *Allergy*  
755 **68**, 921-928 (2013).
- 756 66. Greaves, M.W. Antihistamines in Dermatology. *Skin Pharmacology and*  
757 *Physiology* **18**, 220-229 (2005).
- 758 67. Kuna, P. et al. The role and choice criteria of antihistamines in allergy  
759 management - expert opinion. *Postepy dermatologii i alergologii* **33**, 397-410  
760 (2016).
- 761 68. La Rosa, M.e.a. A randomized, double-blind, placebo-controlled, crossover  
762 trial of systemic flunisolide in the treatment of children with severe atopic  
763 dermatitis. *Current Therapeutic Research* **56**, 720 - 726 (1995).
- 764 69. Ekström, T., Lindgren, B.R. & Tibbling, L. Effects of ranitidine treatment on  
765 patients with asthma and a history of gastro-oesophageal reflux: a double  
766 blind crossover study. *Thorax* **44**, 19-23 (1989).
- 767 70. Dixon, A.E. et al. A pilot randomized controlled trial of pioglitazone for the  
768 treatment of poorly controlled asthma in obesity. *Respiratory Research* **16**,  
769 143 (2015).
- 770 71. Moore, M. et al. Amoxicillin for acute lower respiratory tract infection in  
771 primary care: subgroup analysis of potential high-risk groups. *The British*  
772 *journal of general practice : the journal of the Royal College of General*  
773 *Practitioners* **64**, e75-e80 (2014).
- 774 72. Reznikov, L.R. et al. The vagal ganglia transcriptome identifies candidate  
775 therapeutics for airway hyperreactivity. *American Journal of Physiology-Lung*  
776 *Cellular and Molecular Physiology* **315**, L133-L148 (2018).
- 777 73. Beigelman, A., Chipps, B.E. & Bacharier, L.B. Update on the utility of  
778 corticosteroids in acute pediatric respiratory disorders. *Allergy and asthma*  
779 *proceedings* **36**, 332-338 (2015).
- 780 74. Hua, F., Wang, X. & Zhu, L. Terlipressin Decreases Vascular Endothelial  
781 Growth Factor Expression and Improves Oxygenation in Patients with Acute  
782 Respiratory Distress Syndrome and Shock. *The Journal of Emergency*  
783 *Medicine* **44**, 434-439 (2013).
- 784 75. Crestani, B. et al. Octreotide treatment of idiopathic pulmonary fibrosis: a  
785 proof-of-concept study. *European Respiratory Journal* **39**, 772 (2012).
- 786 76. Abid, S. et al. 17 $\beta$ -estradiol dysregulates innate immune responses to  
787 *Pseudomonas aeruginosa* respiratory infection and is modulated by estrogen  
788 receptor antagonism. *Infection and immunity* **85**, e00422-00417 (2017).
- 789 77. Kharkevich, D.A., Chizh, B.A. & Kasparov, S.A. Stimulant effect of thyrotropin-  
790 releasing hormone and its analog, RGH 2202, on the diaphragm respiratory  
791 activity, and their antagonism with morphine: possible involvement of the N-  
792 methyl-D-aspartate receptors. *Brain research* **551**, 110-115 (1991).
- 793 78. El-Haggar, S.M., Farrag, W.F. & Kotkata, F.A. Effect of ketotifen in obese  
794 patients with type 2 diabetes mellitus. *Journal of Diabetes and its*  
795 *Complications* **29**, 427-432 (2015).
- 796 79. Manjunath, S., Kugali, S.N. & Deodurg, P.M. Effect of clonidine on blood  
797 glucose levels in euglycemic and alloxan-induced diabetic rats and its

- 798 interaction with glibenclamide. *Indian journal of pharmacology* **41**, 218-220  
799 (2009).
- 800 80. Paul, S., Wand, M., Emerick, G.T. & Richter, J.M. The role of latanoprost in an  
801 inflammatory bowel disease flare. *Gastroenterology report* **2**, 232-234  
802 (2014).
- 803 81. Kern, T.S. et al. Topical Administration of Nepafenac Inhibits Diabetes-  
804 Induced Retinal Microvascular Disease and Underlying Abnormalities of  
805 Retinal Metabolism and Physiology. *Diabetes* **56**, 373 (2007).
- 806 82. Pereira Arias, A.M. et al. Indomethacin decreases insulin secretion in patients  
807 with type 2 diabetes mellitus. *Metabolism* **49**, 839-844 (2000).  
808
- 809
- 810
- 811
- 812
- 813
- 814

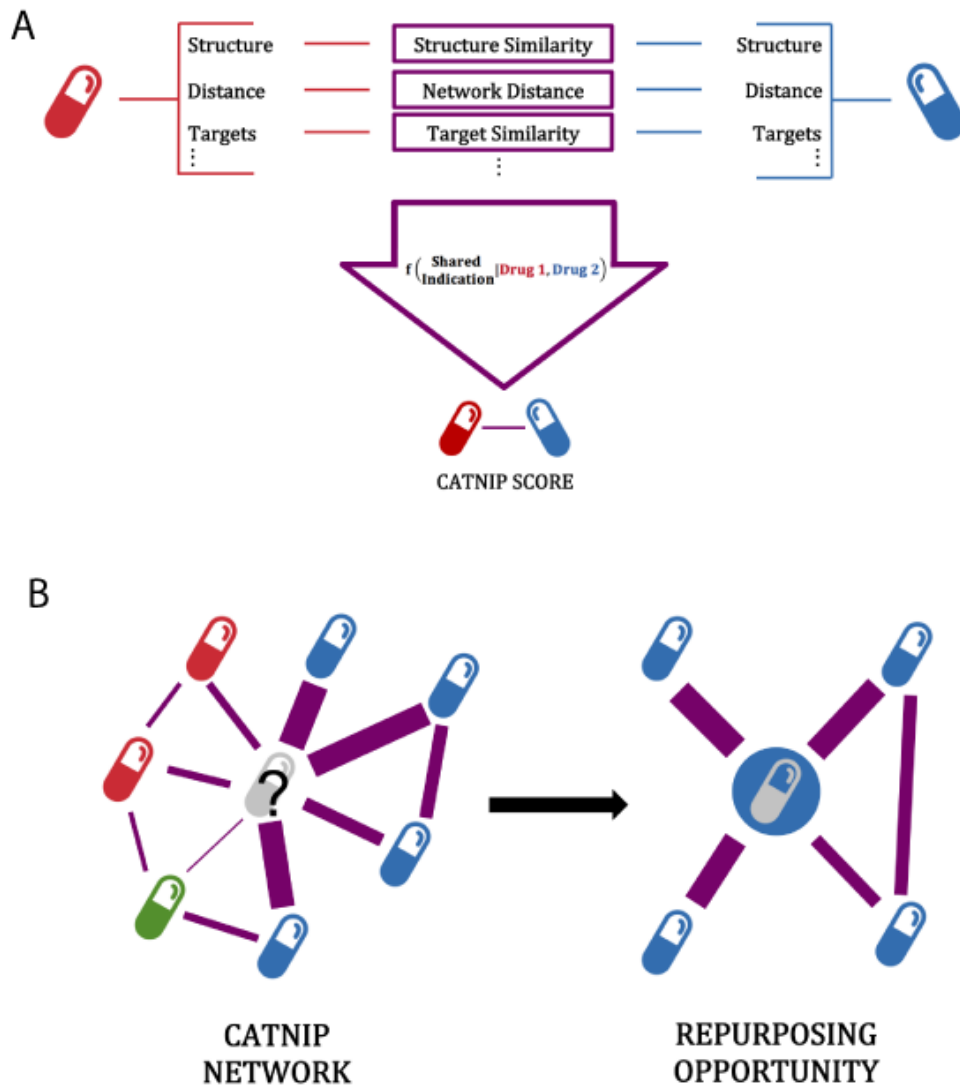

815

816 Figure 1: Schematic of CATNIP repurposing approach. A) The use of drug  
817 similarity properties to predict if two drugs will share an indication using a  
818 gradient boosting model, the model is referred to as CATNIP. B) Schematic  
819 showing the use of CATNIP output scores to create a network, with the scores  
820 used as edge weights. The colors of each drug represent the known disease and  
821 this demonstrates how one could identify novel indications for drugs through the  
822 network.

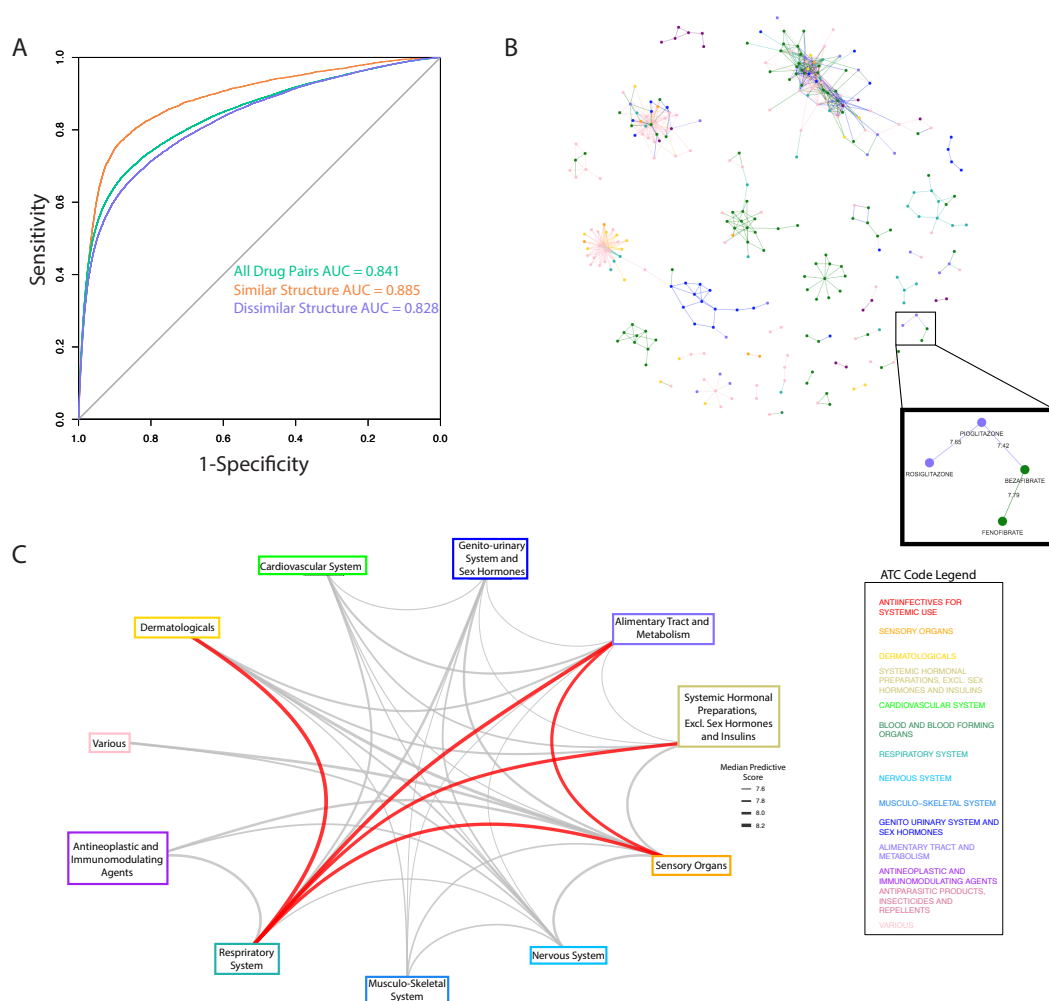

823

824 Figure 2: CATNIP model accurately predicts drugs that share an indication and  
825 can be used for repurposing. A) Receiver-operating characteristic curve for  
826 CATNIP, the performance for drug pairs with high and low structural similarity is  
827 also shown. B) A network of all drug pairs with a CATNIP score higher than 7.4.  
828 Nodes (drugs) are colored based on ATC classification and a specific example of  
829 repurposing between ATC classifications is highlighted. C) A graph of all ATC  
830 classification and the median CATNIP score between the drugs belonging to  
831 each of them (only including drug pairs with > 7.4 CATNIP score). The edges  
832 between ATC Classifications with the highest median CATNIP scores are colored  
833 red.

834



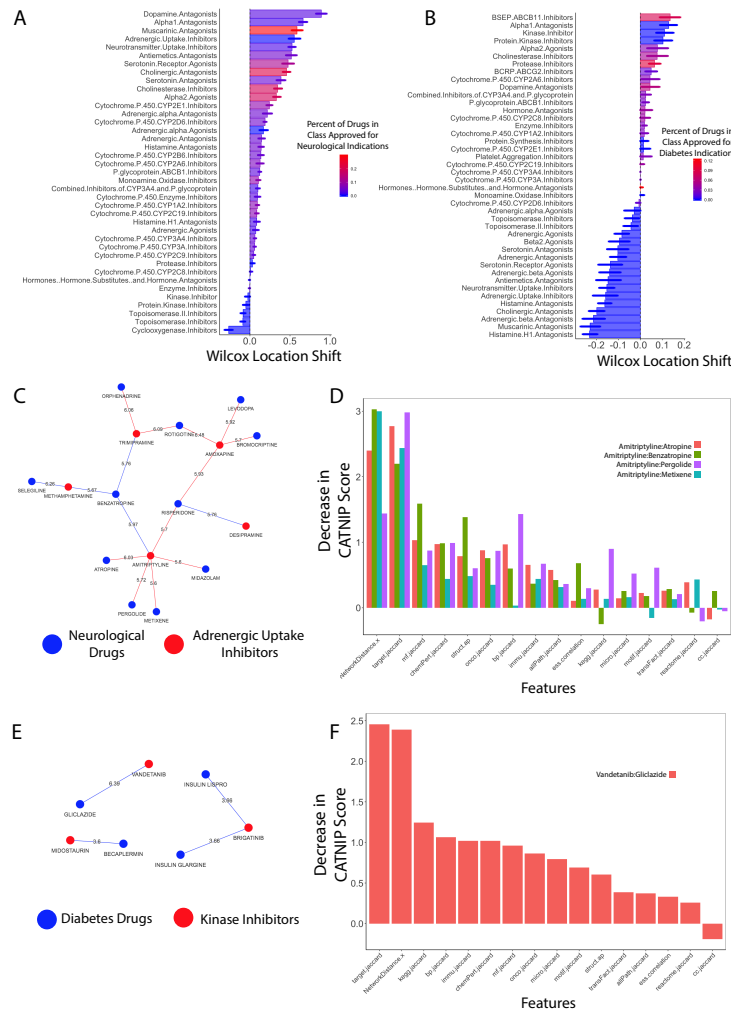

835 Figure 3  
 836 Figure 3: CATNIP identifies drug class repurposing opportunities. The location  
 837 shift, calculated using Wilcox-Mann-Whitney for all CATNIP scores of drug class-  
 838 disease drug pairs vs drug class-non-disease drug pairs for A) “neurological  
 839 diseases” and B) “diabetes”. Drug classes are colored based on the percent of  
 840 drugs within the class that are approved for treatment of the specific disease and  
 841 only significant associations are shown (FDR < 0.1). C) The network of  
 842 neurological drugs and adrenergic uptake inhibitors drug pairs with the highest  
 843 CATNIP scores. D) The decrease in the CATNIP score when removing each  
 844 feature for amitrptyline and select Parkinson’s Disease drugs. E) The network of  
 845 anti-diabetes and kinase inhibitor drug pairs with the highest CATNIP scores. F)  
 846 The decrease in the CATNIP score when removing each feature for the drug pair  
 847 vandetanib and gliclazide.

848 Table 1: Literature Support for ATC Repurposing Predictions

| ATC Code 1                                                          | ATC Code 2                      | Reference |
|---------------------------------------------------------------------|---------------------------------|-----------|
| Dermatologicals                                                     | Respiratory System              | 64-68     |
| Alimentary Tract and Metabolism                                     | Respiratory System              | 69-72     |
| Sensory Organs                                                      | Respiratory System              | 73-75     |
| Systemic Hormonal Preparations, Excluding Sex Hormones And Insulins | Respiratory System              | 76, 77    |
| Sensory Organs                                                      | Alimentary Tract and Metabolism | 78-82     |

849

### 850 **Supplementary Figures**

851 Figure S1: MetaMap performs well in drug indication mapping. A) The number of  
852 occurrences of different UMLS semantic types. B) The accuracy of mapping  
853 indications using MetaMap for indications categorized a “Structured” and the  
854 “Description” section.

855

856 Figure S2: Target ontology similarity data types vary for drug pairs that share an  
857 indication and those that do not. The violin plots of similarity distributions for the  
858 similarities of targets’ A) biological processes, B) cellular component, C)  
859 molecular function, D) chemical perturbation, E) oncological, F) immunogenic, G)  
860 micro-RNA, and H) transcription factor. Statistical significance found by  
861 Kolmogorov-Smirnov test.

862

863 Figure S3: Target similarity data types vary for drug pairs that share an indication  
864 and those that do not. The violin plots of similarity distributions for the similarities  
865 of A) targets, B) the Protein-Protein Interaction network distance between targets  
866 and the C) correlation of target essential within cancer cell lines. Statistical  
867 significance found by Kolmogorov-Smirnov test.

868

869 Figure S4: Target pathway similarity data types vary for drug pairs that share an  
870 indication and those that do not. The violin plots of similarity distributions for the  
871 similarities of the A) reactome pathways, B) all pathway types and C) KEGG  
872 pathways a drug’s target is known to be involved within. Statistical significance  
873 found by Kolmogorov-Smirnov test.

874

875 Figure S5: Structure similarity varies for drug pairs that share an indication and  
876 those that do not. A) The violin plot of the Dice chemical fingerprint similarity,  
877 statistical significance found by Kolmogorov-Smirnov test.

878

879 Figure S6: CATNIP performs significantly better than random. A) The Precision –  
880 Recall curve for classifying if two drugs share an indication using CATNIP and  
881 the random expectation.

882

883 Figure S7: CATNIP identifies drug class repurposing opportunities. The location  
884 shift, calculated using Wilcox-Mann-Whitney for all CATNIP scores of drug class-  
885 disease drug pairs vs drug class-non-disease drug pairs for A) Mental Disorder,  
886 B) Skin Cancer, C) Lung Cancer, D) Breast Cancer, E) Thyroid Cancer, F) Large  
887 Intestine Cancer, G) Upper Aerodigestive Tract Cancer H) Gastric Cancer I)  
888 Renal Cancer. Drug classes are colored based on the percent of drugs within the  
889 class that are approved for treatment of the specific disease and only significant  
890 associations are shown (FDR < 0.1).

891

892 Figure S8: CATNIP identifies other drug class repurposing opportunities within  
893 cancer. The location shift, calculated using Wilcox-Mann-Whitney for all CATNIP  
894 scores of drug class-disease drug pairs vs drug class-non-disease drug pairs for  
895 A) Urinary Tract Cancer, B) Pleura Cancer, C) Endometrium Cancer, D) Ovarian  
896 Cancer, E) Pancreatic Cancer, F) Bone Cancer, G) Oesophagus Cancer, H)  
897 Lymphoma/Leukemia, and I) Autonomic Ganglia Cancer. Drug classes are  
898 colored based on the percent of drugs within the class that are approved for  
899 treatment of the specific disease and only significant associations are shown  
900 (FDR < 0.1).

901

902 Figure S9: CATNIP scores are statistically higher between drugs of certain drug  
903 classes and drugs that treat associated diseases. The distributions of CATNIP  
904 score between A) kinase inhibitors and drugs known to treat cancer and those  
905 that do not and B) dopamine antagonists and drugs known to treat mental illness  
906 and those that do not.

907

908 Figure S10: Target features drive the prediction of trimipramine as a Parkinson's  
909 Disease treatment. A) The decrease in the CATNIP score when removing each  
910 feature for trimipramine and select Parkinson's Disease drugs.

911

912 Figure S11: Many pathways or gene ontology groups overlap, fueling CATNIP  
913 predictions. The overlap between amitriptyline and select Parkinson's Disease  
914 drugs for A) reactome pathways, B) KEGG pathways, and D) molecular function  
915 gene ontologies. The overlap between vandetanib and gliclazide for A) reactome  
916 pathways, B) KEGG pathways, and D) molecular function gene ontologies.

917

## 918 **Supplementary Tables**

919 Table S1: The drug similarity features used within CATNIP.

920

921 Table S2: Comparison of model performance using other model types.

922

## 923 **Supplementary Data**

924 File 1: All pathways and gene ontologies that amitriptyline's targets and the  
925 targets of select Parkinson's Disease drugs' targets are associated with.

926

927 File 2: All pathways and gene ontologies that trimipramine's targets and the  
928 targets of select Parkinson's Disease drugs' targets are associated with.

929

930 File 3: All pathways and gene ontologies that vandetanib's targets and  
931 gliclazide's are associated with.

932

933
